# Supplementary material for: Mn2+ complexes of open-chain ligands with a pyridine backbone: less donor atoms lead to higher kinetic inertness
Source: Royal Society of Chemistry journal article supplement (doi:10.1039/c8nj00648b), 2018-01-01
Supplement: c8nj00648b1.pdf [file c8nj00648b1.pdf]

Electronic Supplementary Information for :

## Mn<sup>2+</sup> complexes of open-chain ligands with a pyridine backbone: less donor atoms lead to higher kinetic inertness

Sophie Laine,<sup>a</sup> Célia S. Bonnet,<sup>a</sup> Ferenc K. Kálmán,<sup>b</sup> Zoltán Garda,<sup>b</sup> Agnès Pallier,<sup>a</sup> Fabien Caillé,<sup>a,c</sup> Franck Suzenet,<sup>c</sup> Gyula Tircsó<sup>b,\*</sup> and Éva Tóth<sup>a,\*</sup>

<sup>a.</sup> Centre de Biophysique Moléculaire, CNRS, Université d'Orléans, rue Charles Sadron, 45071 Orléans, Cedex 2, France

<sup>b.</sup> Department of Inorganic and Analytical Chemistry, Faculty of Science and Technology, University of Debrecen, Debrecen, Egyetem tér 1, H-4010, Hungary.

<sup>c.</sup> Institut de Chimie Organique et Analytique, UMR 7311 CNRS, Université d'Orléans, rue de Chartres, 45067 Orléans, France

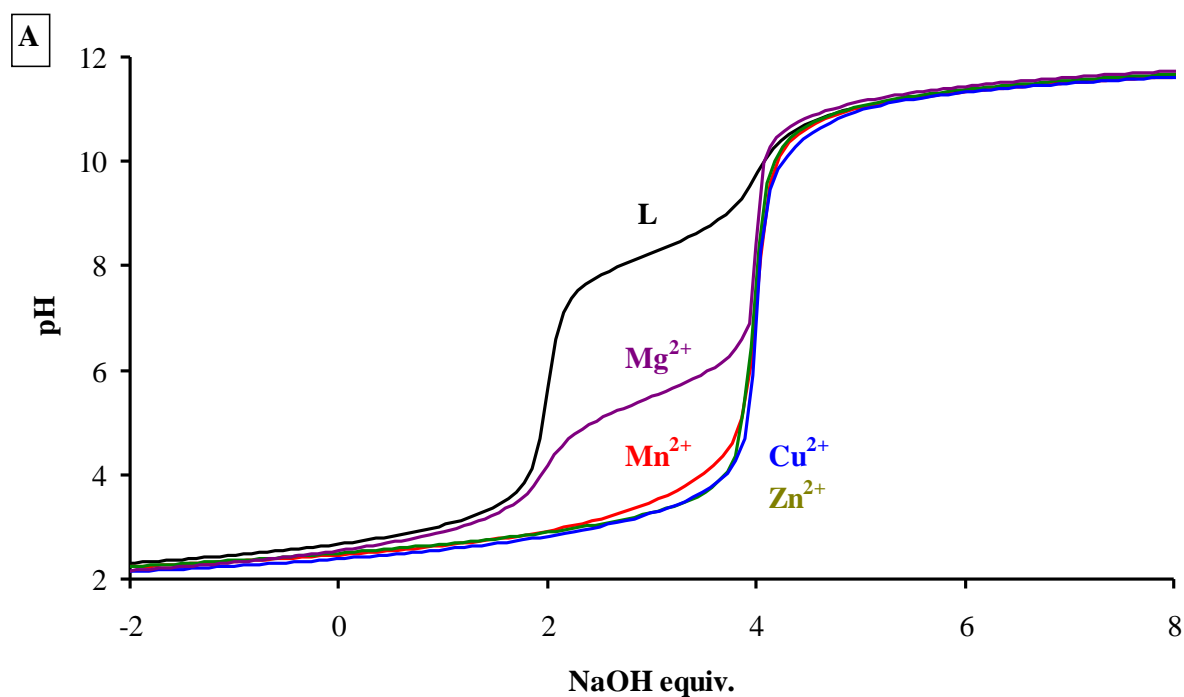

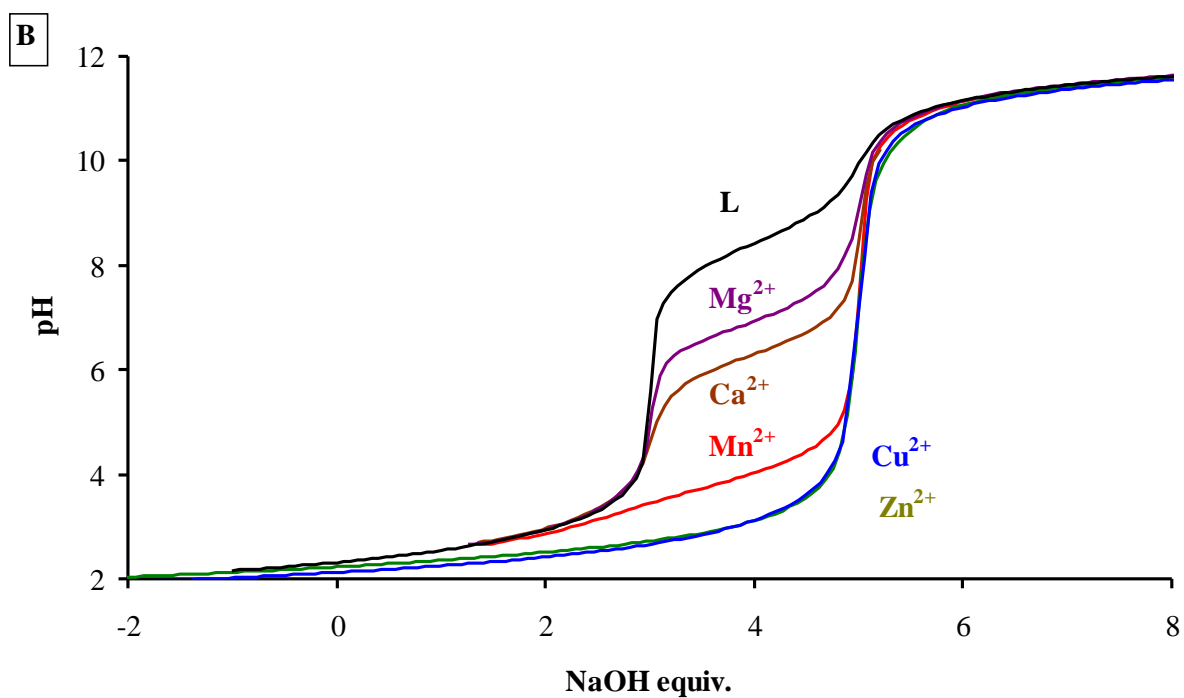

**Figure S1:** Potentiometric titration curves of solutions containing  $\text{L}^1$  (1.87mM) (A) and  $\text{L}^3$  (2.33mM) (B), with 0 and 1 equivalent of  $\text{MgCl}_2$ ,  $\text{CaCl}_2$ ,  $\text{MnCl}_2$ ,  $\text{ZnCl}_2$  and  $\text{CuCl}_2$ .  $I = 0.15\text{M NaCl}$ , 298K.

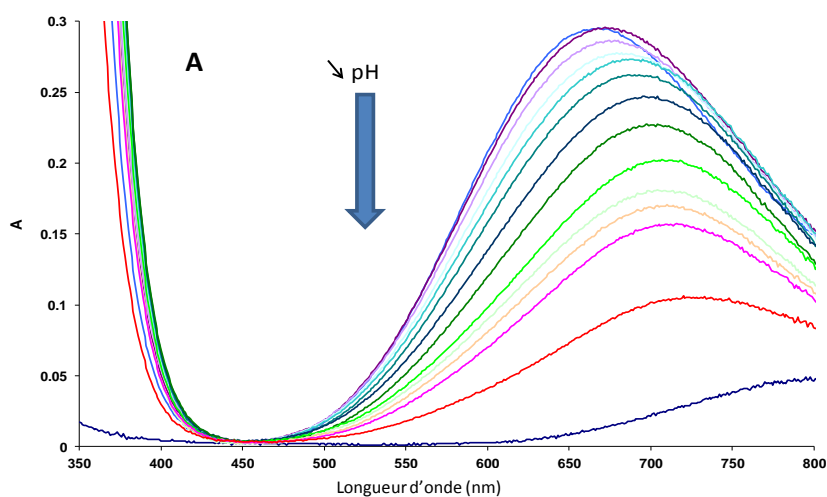

**Figure S2.** UV-visible spectra recorded in a solution containing 2.63 mM  $\text{Cu}^{2+}$  and 2.63 mM  $\text{L}^1$  at increasing concentrations of  $\text{H}^+$  (from 0.01362 to 0.9852 M) 25°C, 1.0 M NaCl.

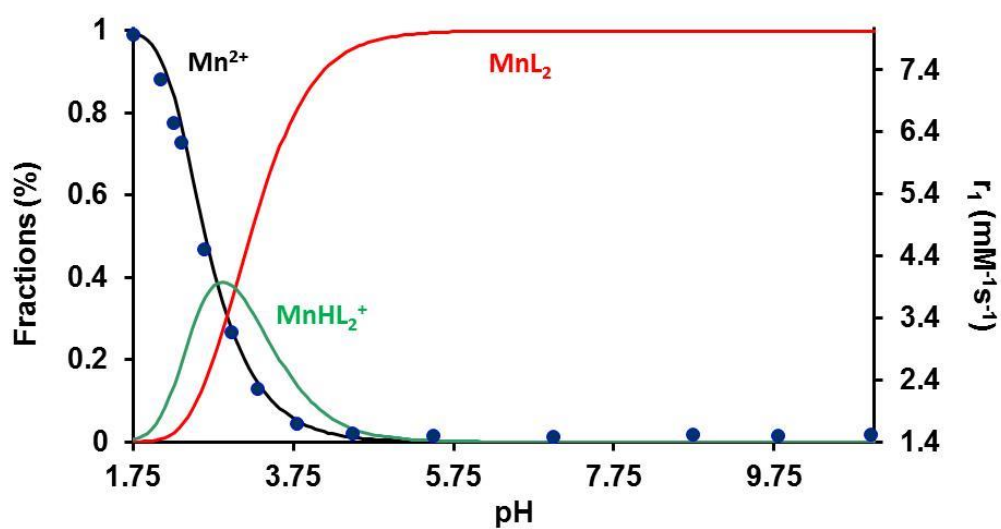

**Figure S3.** pH-dependent relaxivities (blue dots) measured in a solution containing equimolar quantities of  $\text{Mn}^{2+}$  and  $\text{L}^2$  (20 MHz, 25 °C) and species distribution curves (solid lines) calculated by using the stability constants presented in Table 2 of the manuscript.

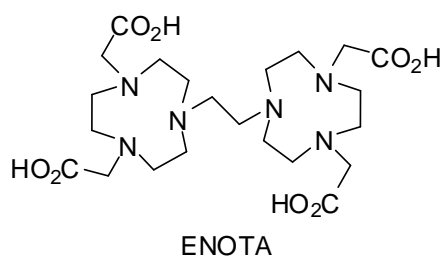

**Scheme S1.** Structure of ENOTA

## Equations used for the treatment of the relaxometric data

**<sup>17</sup>O NMR data** have been fitted according to the Swift and Connick equations [1]. The reduced transverse <sup>17</sup>O relaxation rates,  $1/T_{2r}$ , have been calculated from the measured relaxation rates  $1/T_2$  of the paramagnetic solutions and from the relaxation rates  $1/T_{2A}$  of the diamagnetic reference:

$$\frac{1}{T_{2r}} = \frac{1}{P_m} \left[ \frac{1}{T_2} - \frac{1}{T_{2A}} \right] = \frac{1}{\tau_m} \frac{T_{2m}^{-2} + \tau_m^{-1} T_{2m}^{-1} + \Delta\omega_m^2}{(\tau_m^{-1} + T_{2m}^{-1})^2 + \Delta\omega_m^2} \quad (S1)$$

$\Delta\omega_m$  is determined by the hyperfine or scalar coupling constant,  $A_O/\hbar$ , where  $B$  represents the magnetic field,  $S$  is the electron spin and  $g_L$  is the isotropic Landé  $g$  factor (Equation (S2)).

$$\Delta\omega_m = \frac{g_L \mu_B S(S+1)B}{3k_B T} \frac{A_O}{\hbar} \quad (S2)$$

The <sup>17</sup>O transverse relaxation rate is mainly determined by the scalar contribution,  $1/T_{2sc}$ , and it is given by Equation (S3).

$$\frac{1}{\tau_s} = \frac{1}{\tau_m} + \frac{1}{T_1} \quad (S3)$$

The exchange rate,  $k_{ex}$ , (or inverse binding time,  $\tau_m$ ) of the inner sphere water molecule is assumed to obey the Eyring equation (Equation (S4)) where  $\Delta S^\ddagger$  and  $\Delta H^\ddagger$  are the entropy and enthalpy of activation for the exchange, and  $^{298}k_{ex}$  is the exchange rate at 298.15 K.

$$\frac{1}{\tau_m} = k_{ex} = \frac{k_B T}{h} \exp \left\{ \frac{\Delta S^\ddagger}{R} - \frac{\Delta H^\ddagger}{RT} \right\} = \frac{k_{ex}^{298} T}{298.15} \exp \left\{ \frac{\Delta H^\ddagger}{R} \left( \frac{1}{298.15} - \frac{1}{T} \right) \right\} \quad (S4)$$

For the fit of the <sup>17</sup>O  $T_2$  data, we used an exponential function to treat the temperature dependency of  $1/T_{1e}$ :

$$\frac{1}{T_{1e}} = \frac{1}{T_{1e}^{298}} \exp \left\{ \frac{E_v}{R} \left( \frac{1}{T} - \frac{1}{298.15} \right) \right\} \quad (S5)$$

**The proton relaxivities** (normalized to 1 mM Mn(II) concentration) originate from inner- and outer-sphere contributions (Equation (S6)):

$$r_1 = r_{\text{is}} + r_{\text{los}} \quad (\text{S6})$$

The inner-sphere term is given by Equation (S7), where  $q$  is the number of inner-sphere water molecules.

$$r_{\text{is}} = \frac{1}{1000} \times \frac{q}{55.55} \times \frac{1}{T_{\text{lm}}^{\text{H}} + \tau_{\text{m}}} \quad (\text{S7})$$

In the longitudinal relaxation rate of inner sphere water protons,  $1/T_{\text{lm}}^{\text{H}}$ , the dipolar contribution dominates (Equation (S8)):

$$\frac{1}{T_{\text{lm}}^{\text{H}}} \cong \frac{1}{T_1^{\text{DD}}} = \frac{2}{15} \left( \frac{\mu_0}{4\pi} \right)^2 \frac{\eta^2 \gamma_{\text{S}}^2 \gamma_{\text{I}}^2}{r_{\text{MnH}}^6} S(S+1) \left[ \frac{3\tau_{\text{d1H}}}{1 + \omega_{\text{I}}^2 \tau_{\text{d1H}}^2} + \frac{7\tau_{\text{d2H}}}{1 + \omega_{\text{S}}^2 \tau_{\text{d2H}}^2} \right] \quad (\text{S8})$$

Here  $r_{\text{MnH}}$  is the effective distance between the  $\text{Mn}^{2+}$  electron spin and the water protons,  $\omega_{\text{I}}$  is the proton resonance frequency,  $\tau_{\text{d1H}}$  is given by Eq. 9, where  $\tau_{\text{RH}}$  is the rotational correlation time of the  $\text{Mn(II)}\text{--H}_{\text{water}}$  vector:

$$\frac{1}{\tau_{\text{d1H}}} = \frac{1}{\tau_{\text{m}}} + \frac{1}{\tau_{\text{RH}}} + \frac{1}{T_{\text{ic}}} \quad i = 1, 2; \quad (\text{S9})$$

$$\tau_{\text{RH}} = \tau_{\text{RH}}^{298} \exp \left\{ \frac{E_{\text{R}}}{R} \left( \frac{1}{T} - \frac{1}{298.15} \right) \right\} \quad (\text{S10})$$

The electronic relaxation is mainly governed by modulation of the transient zero-field splitting, and for the electron spin relaxation rates,  $1/T_{1\text{e}}$  and  $1/T_{2\text{e}}$ , McMachlan has developed Equations (S11)–(S13) which were used in the fit of the NMRD data [2]:

$$\left( \frac{1}{T_{1\text{e}}} \right) = \frac{32}{25} \Delta^2 \left( \frac{\tau_{\text{v}}}{1 + \omega_{\text{S}}^2 \tau_{\text{v}}^2} + \frac{4\tau_{\text{v}}}{1 + 4\omega_{\text{S}}^2 \tau_{\text{v}}^2} \right) \quad (\text{S11})$$

$$\left( \frac{1}{T_{2\text{e}}} \right) = \frac{32}{50} \Delta^2 \left[ 3\tau_{\text{v}} + \frac{5\tau_{\text{v}}}{1 + \omega_{\text{S}}^2 \tau_{\text{v}}^2} + \frac{2\tau_{\text{v}}}{1 + 4\omega_{\text{S}}^2 \tau_{\text{v}}^2} \right] \quad (\text{S12})$$

$$\tau_{\text{v}} = \tau_{\text{v}}^{298} \exp \left\{ \frac{E_{\text{v}}}{R} \left( \frac{1}{T} - \frac{1}{298.15} \right) \right\} \quad (\text{S13})$$

where  $\Delta^2$  is the trace of the square of the transient zero-field-splitting (ZFS) tensor,  $\tau_v$  is the correlation time for the modulation of the ZFS with the activation energy  $E_v$ , and  $\omega_s$  is the Larmor frequency of the electron spin.

The outer-sphere contribution to the overall relaxivity is described by Equation (S14), where  $N_A$  is the Avogadro constant, and  $J_{os}$  is a spectral density function (Equation (S15)).

$$r_{1os} = \frac{32N_A\pi}{405} \left( \frac{\mu_0}{4\pi} \right)^2 \frac{\eta^2 \gamma_s^2 \gamma_I^2}{a_{MnH} D_{MnH}} S(S+1) [3J_{os}(\omega_I, T_{1e}) + 7J_{os}(\omega_S, T_{2e})] \quad (S14)$$

$$J_{os}(\omega, T_{je}) = \text{Re} \left[ \frac{1 + \frac{1}{4} \left( i\omega\tau_{MnH} + \frac{\tau_{MnH}}{T_{je}} \right)^{1/2}}{\left( 1 + \left( i\omega\tau_{MnH} + \frac{\tau_{MnH}}{T_{je}} \right)^{1/2} \right)^2 + \frac{4}{9} \left( i\omega\tau_{MnH} + \frac{\tau_{MnH}}{T_{je}} \right) + \frac{1}{9} \left( i\omega\tau_{MnH} + \frac{\tau_{MnH}}{T_{je}} \right)^{3/2}} \right] \quad (S15)$$

$j = 1, 2$

The diffusion coefficient for the diffusion of a water proton away from a Mn(II) complex,  $D_{MnH}$ , obeys the exponential temperature dependence described by Equation (S16), with activation energy  $E_{MnH}$ :

$$D_{MnH} = D_{MnH}^{298} \exp \left\{ \frac{E_{MnH}}{R} \left( \frac{1}{298.15} - \frac{1}{T} \right) \right\} \quad (S16)$$

## References

- [1] Swift T. J., Connick R. E., J.Chem.Phys. 1962, 37, 307-320.
- [2] McLachlan A. D., Proc. R. Soc. London, Ser. A. 1964, 280, 271-288.
